# Solid state anaerobic digestion of mixed organic waste: the synergistic effect of food waste addition on the destruction of paper and cardboard

Nigel G. H. Guilford<sup>1,\*</sup>, HyunWoo Peter Lee<sup>1</sup>, Kärt Kanger<sup>1,2</sup>, Torsten Meyer<sup>1</sup>, and Elizabeth A. Edwards<sup>1,\*</sup>

<sup>1</sup>Department of Chemical Engineering and Applied Chemistry and BioZone, University of Toronto, 200 College Street, Toronto, Ontario, Canada, M5S 3E5

<sup>2</sup>Faculty of Science and Technology, University of Tartu, Tartu, Estonia

\*Corresponding authors: NGH Guilford and EA Edwards

Address correspondence to:

Elizabeth A. Edwards: [elizabeth.edwards@utoronto.ca](mailto:elizabeth.edwards@utoronto.ca)

Nigel Guilford: [nigel.guilford@utoronto.ca](mailto:nigel.guilford@utoronto.ca)

Short title: Solid state anaerobic digestion of mixed organic waste

Keywords: Anaerobic digestion, organic fraction municipal solid waste, food waste, lignocellulosic fibres

Table of Contents (TOC)/Abstract Art:

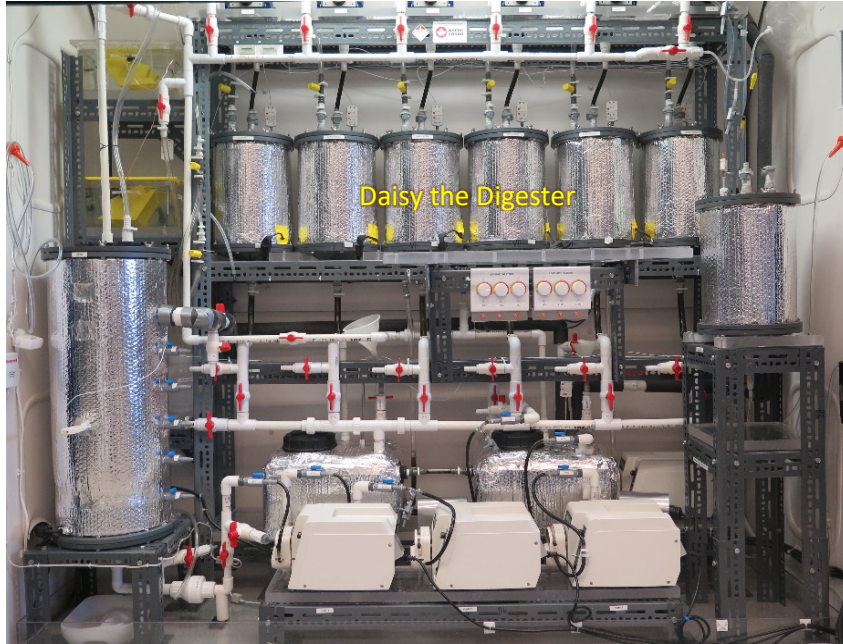

## 1 **ABSTRACT**

2 Full-scale anaerobic digestion processes for organic solid waste are common in Europe, but generally  
3 unaffordable in Canada and the United States because of inadequate regulations to restrict cheaper  
4 forms of disposal, particularly landfill. We investigated the viability of solid-state anaerobic digestion  
5 (SS-AD) as an alternative that reduces the costs of waste pretreatment and subsequent wastewater  
6 treatment. A laboratory SS-AD digester, comprising six 10L leach beds and an upflow anaerobic sludge  
7 blanket reactor treating the leachate, was operated continuously for 88 weeks, with a mass balance of  
8  $101 \pm 2\%$ . The feed was a mixture of cardboard, boxboard, newsprint, and fine paper, and varying  
9 amounts of food waste (from 0% to 29% on a COD basis). No process upset or instability was observed.  
10 The addition of food waste showed a synergistic effect, raising  $\text{CH}_4$  production from the fibre mixture  
11 from  $52.7 \text{ L.kg}^{-1}\text{COD}_{\text{fibre added}}$  to  $152 \text{ L.kg}^{-1}\text{COD}_{\text{fibre added}}$ , an increase of 190%. Substrate COD destruction  
12 efficiency reached 65% and a methane yield of  $225 \text{ L.kg}^{-1}\text{COD}_{\text{added}}$  was achieved at 29% food waste on a  
13 COD basis, and a solids retention time of 42 days. This performance was similar to that of a completely  
14 stirred tank reactor digesting similar wastes, but with much lower energy input.

15

## 16 **1. INTRODUCTION**

17 Anaerobic digestion (AD) is a well-established method for the treatment of organic solid waste and the  
18 production of renewable energy. In a comparative study, Hodge et al. (2016) concluded that, among  
19 composting, landfilling, combustion with energy recovery and AD, a combination of AD and landfill was  
20 the leading alternative in terms of lowering global warming potential. Solid organic waste is  
21 heterogeneous, variable and complex. Consequently, conventional anaerobic digesters (De Baere &  
22 Mattheeuws, 2013; Guilford, 2009) must be preceded by extensive pretreatment, such as sorting, size  
23 reduction, contaminant removal, and water addition, to render the feedstock suitable for processing, all  
24 of which add significantly to the cost.

25  
26 The Landfill Directive of the European Union (1999) restricts the disposal of organic wastes, and has  
27 driven the widespread adoption of more expensive waste processing technologies, particularly  
28 anaerobic digestion. Canada and the United States lack similar, overarching, regulations; consequently,  
29 anaerobic digestion is common in Europe and relatively rare in North America. As a direct result, in  
30 Canada, most organic waste (about 10 million tonnes per year (Government of Canada, 2015) consisting  
31 of about 38% food waste 62% paper and cardboard (City of Ottawa, 2007; Government of Ontario,  
32 2004) is still disposed of in landfills which, in the aggregate, generate about 20 million tonnes per year of  
33 greenhouse gases (CO<sub>2</sub> eq.) (Environment Canada, 2017); furthermore, a source of renewable energy is  
34 largely forgone. Satchwell et al. (2018) note the advantages of solid-state anaerobic digestion (SS-AD),  
35 including less pretreatment and reduced wastewater treatment, but identify numerous scientific,  
36 operational, and policy challenges limiting its wider adoption in the United States and Canada.

37  
38 In an attempt to circumvent the lack of strong regulations, or incentives, in North America (Guilford,  
39 2017), a new approach to AD was developed and patented to treat all forms of solid organic waste from  
40 residential and commercial sources (Forrestal et al., 2006a; Forrestal et al., 2006b). The underlying  
41 principle, derived from bioreactor landfill practices, is to accommodate the properties of the waste as-  
42 received as far as possible. The process employs SS-AD; the waste remains stationary, and the leachate  
43 generated by its degradation is recirculated through the waste. Biogas is recovered and put to beneficial  
44 use, and the digestate remaining is aerobically cured and turned into compost. It is designed to  
45 accommodate the complex properties of solid waste with minimal pretreatment, with the ultimate goal  
46 of being cost-competitive with landfill; initial estimates suggested that this can be achieved (Guilford,  
47 2009). In exchange for simplicity of design, some trade-offs were expected. For example, it was assumed  
48 that a lower substrate destruction efficiency would be achieved, with a longer solids retention time

49 (SRT), and a larger physical footprint required (compared to, for example, a CSTR), but that capital and  
50 operating costs would be lower.

51  
52 The AD technologies commonly applied to solid waste employ various configurations and operating  
53 conditions (De Baere & Mattheeuws, 2013). The majority are single stage, and either plug flow or CSTRs,  
54 operating at 38°C or 55°C. They digest primarily food waste (FW) and the organic fraction of municipal  
55 solid waste (OFMSW), plus some leaf and yard waste in some cases. Consequently, most of the research  
56 on the AD of organic solid waste uses FW or OFMSW as the substrate. Zhang et al. (2012) measured the  
57 digestibility of OFMSW in a CSTR, giving 62% substrate destruction as volatile solids (VS) and yielding  
58 304 L CH<sub>4</sub>/kg VS<sub>added</sub>; Browne et al. (2013a; 2013b; 2014) tested a two-stage digester comprising leach  
59 beds (LBs) and upflow anaerobic sludge blanket (UASB), giving 75% substrate destruction as VS digesting  
60 OFMSW and yielding 384 L CH<sub>4</sub>/kg VS<sub>added</sub>, but experienced serious problems with hydraulic conductivity,  
61 ammonia inhibition, and volatile fatty acid (VFA) inhibition. Though lignocellulosic fibers make up a high  
62 proportion of solid organic waste, only a very few studies have examined the digestibility of these  
63 substrates (Di Maria et al., 2017; Eleazer et al., 1997; Pommier et al., 2010; Yuan et al., 2012; Yuan et al.,  
64 2014). These previous experiments are summarized in Results and Discussion, Section 3.8.

65  
66 To evaluate the effectiveness of SS-AD, we designed and built Daisy the Digester, a lab-scale version of  
67 the new SS-AD digester design (Guilford, 2009), a hybrid system combining the robustness and simplicity  
68 of a landfill bioreactor with the benefits of multi-stage digestion. Daisy comprises six sequentially-fed  
69 leach beds, an upflow anaerobic sludge blanket (UASB) and two tanks, plus ancillary components and a  
70 control system. We also designed a feed stream composed of a mixture of cardboard (CB), boxboard  
71 (BB), newsprint (NP) and fine paper (FP), collectively representing the fibre fraction (FB), plus varying  
72 amounts of food waste, to simulate the range of composition of industrial, commercial and institutional

73 waste (IC&I) (Government of Canada, 2010). In order to maintain permeability, shredded ash wood was  
74 added as a bulking agent (BA). The objectives of the research were to measure process stability and  
75 digester performance (methane yield and substrate destruction efficiency) in response to variations in  
76 the proportion of food waste added, for comparison with more conventional CSTR-type wet digesters  
77 processing similar wastes. As a result of extensive careful and frequent monitoring of the system, the  
78 mass balance over the entire 88-week experiment was nearly perfectly conserved, revealing a  
79 remarkably strong effect of food waste on the extent of digestion of the fiber fraction.

80

## 81 **2. MATERIALS AND METHODS**

### 82 **2.1 Daisy the Digester - Design**

83 The design is derived from bioreactor landfill practice, in which leachate recirculation accelerates the  
84 decomposition of unsorted solid waste (Guilford, 2009). Daisy comprises six 10L leach beds (8.5L  
85 working volume), a UASB (27.5L working volume), a UASB feed tank (Tank 1) and a leach bed feed tank  
86 (Tank 2) (17.5L working volume each), three peristaltic pumps (P1, P2, and P3) and two wet-tip gas  
87 meters (GM1 and GM2) to measure biogas volumes produced (Fig. 1). The tanks and the UASB are  
88 heated automatically with self-regulating heat tape; each has a programmable thermostatic controller;  
89 the LBs have manually controlled heaters. The frequency and volume of leachate delivered to the leach  
90 beds is controlled automatically with a programmable logic controller (PLC); leachate is recirculated  
91 from Tank 2, via P3, through the upper manifold, and back to Tank 2. Periodically, the automatic valves,  
92 controlled by the PLC, open in sequence and redirect the flow to each leach bed in turn. The cycle  
93 repeats continuously. Leachate drains from each leach bed to a common manifold and into Tank 1; it is  
94 then transferred by P1, via a clarifier within the tank, to the UASB. Effluent from the UASB is discharged  
95 to Tank 2. The hydraulic balance between Tank 1 and Tank 2 is maintained by P2 and an overflow pipe  
96 connecting the two. Hydraulically, Daisy is a closed system. Biogas from the UASB is discharged through

97 GM1, and the aggregated biogas from six LBs and two tanks is discharged through GM2. Daisy runs at a  
98 slight positive pressure of 1.2 kPa, generated by 12 cm water column in gas meters. Fig 1B shows 9 liquid  
99 sampling valves; V2 (UASB feed) was used for all the samples reported here; the balance were used in a  
100 companion study (Lee, 2018) intended for publication at a later date. The design basis, construction,  
101 and operation of Daisy are described in much greater detail elsewhere (Guilford, 2017).

102

## 103 **2.2 Operational set-up of Daisy**

104 Daisy operated as a sequentially-fed batch reactor with a fresh LB of waste (containing 1.2 to 1.7 kg of  
105 substrate as COD) added once per week, replacing a 6-week old leach bed that was removed for  
106 analysis. As depicted in Fig. 1B, LB 1 is due for replacement after an SRT of 42 days. The UASB and Tank 1  
107 were set at 37°C; Tank 2 was set at 39°C (this was to provide additional heat to the LBs, before they  
108 were equipped with manual heaters at week 25). The leachate recirculation rate remained constant  
109 throughout at 565 mL per LB, every 30 minutes. This value was derived from Murto et al. (2013) who  
110 reported a flowrate of 16.5 L.min<sup>-1</sup> in a 5.2 m<sup>3</sup> leach bed containing 3.4 t of waste plus 2.6 m<sup>3</sup> of water,  
111 or 2.8 t of a mixture of waste and bulking agent plus 2.6 m<sup>3</sup> of water. The UASB was fed at 125 mL.min<sup>-1</sup>  
112 giving a hydraulic retention time (HRT) of 3.6h and an upflow velocity ( $V_{up}$ ) of 0.5 m.h<sup>-1</sup>. The peristaltic  
113 pumps were calibrated with and without a 1.3m head, with new tubing and with worn tubing (Norprene  
114 A-60-G); the calibration remained unchanged. The wet tip meters (GM1 and GM2), supplied by Archaea  
115 Press, were calibrated using a continuous water-displacement method (Guilford, 2017); biogas  
116 production (100mL/tip) was recorded in the datalogger every 5 minutes and also every hour.  
117 Temperature was recorded every 15 minutes (six LBs, two tanks, GM2 and the UASB). Biogas volumes  
118 were corrected to STP using the recorded temperature inside GM2, and the barometric pressure was  
119 recorded by a weather station located on the roof of the building.

120

### 121 **2.3 Feedstock and digestate – preparation, sampling and analysis**

122 All components of the feedstock were recovered from residential waste recycling programs and  
123 prepared as follows. The CB and BB were coarsely shredded (<3cm x 4cm); the FP and NP were shredded  
124 in an office shredder (< 5cm x 0.5 cm); the BA, consisting of prepared ash wood, was supplied in 6  
125 batches (BA#1 to BA#6). BA#5 was processed through a chipper; the other five were shredded in a Roto-  
126 Chopper and screened to <5cm; all were stored in bulk. The FW was recovered from a residential green  
127 bin program in the Region of Durham, Ontario (which prohibits sanitary products and non-compostable  
128 plastic). It was presorted to remove plastic and larger junk, shredded to <10cm in a shear shredder, and  
129 stored in sealed plastic bags (~1.5kg ea.) at -20°C.

130  
131 The FW was thawed as needed, and hand-sorted to remove bones, inorganic matter, and smaller foreign  
132 objects; it was either fed directly to Daisy (weeks 12 to 76), or first pulped in a blender with an equal  
133 quantity of water (weeks 1 to 11 and 77 to 88). The fibres (FB) and BA were weighed, and mixed dry, in a  
134 20L bucket using large stainless-steel spoons. Water was added to saturate the fibres (between 3.8L and  
135 3.2L depending on the amount of food waste added); the FW was added last and thoroughly mixed in  
136 using the same method.

137  
138 To measure the digestibility of individual components of the feed, at different levels of FW addition  
139 under actual digester conditions, stainless steel tea balls or 'coupons' (Fig. S1), were filled with samples  
140 of a single fibre (between 1 and 4g), and inserted into the waste. Thus, at any given moment, four of the  
141 LBs each contained six 2.5 cm tea balls comprising two triplicate sets; for example, three of CB and three  
142 of NP, or three of BB and three of FP. The other two LBs each contained a single 5 cm tea ball containing  
143 a sample of BA (7 to 11g); the larger size was necessitated by the morphology of the BA.

144



145 Each week fresh waste (feed) was placed into a LB, tamped down by hand, the head space measured,  
146 the lid installed, and the assembly flushed, leak tested, and pressurized to 50 cm water column (WC),  
147 with argon, before installation in Daisy. Quick-disconnect fittings with shut-off valves enabled rapid LB  
148 removal and replacement without ingress of air. At the end of each digestion period (typically 6 weeks),  
149 a LB was removed and replaced with a LB of fresh waste. After removal, each LB was drained for 24h,  
150 and the recovered leachate returned to Tank 1 (through a valved port to preserve gas pressure). The  
151 headspace was re-measured and the settlement noted. The coupons were removed and weighed and  
152 their TS/VS determined using standard methods; 50 mL samples of the digestate (DG) were taken from  
153 13, 20, 25 and 28 cm from the top of the LB, for determination of TS/VS; a separate sample (also taken  
154 at 25 cm) was analyzed for COD. A 300g bulk sample of DG was retained and frozen at -20°C. A detailed  
155 record of the input and output for every LB was maintained. An example is shown in Table S1.

156

## 157 **2.4 Experimental Design**

158 The 88-week experiment was divided into 12 periods, each representing a different set of operating  
159 conditions (Table 1). After initial start-up, which took 5 weeks, the impact of specific process changes  
160 was investigated. In Period 1 (weeks 6 to 15) consistent operation was established. The solids retention  
161 time (SRT) was always set at 42d except during Period 2 (weeks 16 to 24) which briefly explored an  
162 increase in SRT to 49d (7 weeks) by omitting LB replacement every 6th week; in Period 3 Daisy was  
163 returned to 42d (6 week) SRT; COD<sub>FW</sub> addition was 17.2% throughout Periods 1, 2 and 3. In Periods 4a,  
164 4b, and 4c, COD<sub>FW</sub> addition was reduced to 12.9%, 7.9% and 0% respectively. In Period 5, COD<sub>FW</sub> addition  
165 was returned to 17.2% in a single step; a change to a new batch of bulking agent at week 58 caused a  
166 decline in performance which took 15 weeks to resolve. In Period 6a COD<sub>FW</sub> addition was increased to  
167 21.2% and in Period 6b to 29.3%.

168

## 169 **2.5 Sampling and Analytical Methods**

170 The sampling, analytical and data management methods used are summarized below; a more detailed  
171 description is provided in the Supporting Information (SI). The elemental composition of each individual  
172 component of the feedstock was determined using a Thermoflash 2000 CHN analyzer; TKN was also  
173 measured to achieve greater precision for nitrogen. Total solids (TS), volatile solids (VS) and chemical  
174 oxygen demand (COD) were measured using standard methods (APHA, 1992); VS was used for  
175 comparison with published results, COD measurements formed the basis of the mass balance  
176 calculation. The COD content of all feedstocks was also calculated from their elemental composition, for  
177 comparison to the measured values.

178  
179 Four leachate samples were withdrawn from valve V2 (Fig. 1B) four times per week. One (15 mL) was  
180 analyzed for TS, VS, and COD using standard methods (APHA 92); the second (50 mL) to determine the  
181 pH and alkalinity ratio, the third (2x10 mL) was prepared and stored for subsequent microbial analysis  
182 and the fourth (10 mL) was filtered using 0.22 $\mu$ m nylon syringe filter and stored at -20°C for subsequent  
183 ion chromatography (IC) analysis for VFAs and sulphate. Sampling for VFA and microbial analysis began  
184 at week 35. Approximately every two weeks, samples of biogas (200  $\mu$ L) were extracted through septa,  
185 installed in the infeed lines to GM1 and GM2, and analyzed for CH<sub>4</sub> and CO<sub>2</sub> using a gas chromatograph  
186 with a thermal conductivity detector (GC-TCD). Temperatures and biogas volumes were recorded in the  
187 data logger and downloaded daily. A daily activity log was maintained to record all inputs and outputs  
188 (time, type and volume), system adjustments, operating anomalies, and corrective measures.

189

## 190 2.6 Calculations

191 The stoichiometric formula of the substrates  $C_nH_aO_bN_c$ , and the stoichiometry of digestion, were  
 192 calculated from elemental analysis of the weighted average composition of the substrates fed to Daisy  
 193 (weeks 6 to 88 inclusive) using Equations (1-4) (Rittmann & McCarty, 2001).

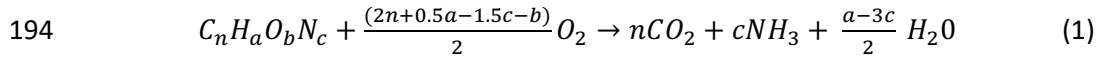

195 The COD of each substrate was calculated from:

$$196 \quad \frac{COD}{Mass} = \frac{2n+0.5a-1.5c-b16}{12n+a+16b+14c} \quad (2)$$

197 where:

$$198 \quad n = \frac{\%C}{12T}, \quad a = \frac{\%H}{T}, \quad b = \frac{\%O}{16T}, \quad \text{and } c = \frac{\%N}{14T} \quad (3)$$

$$199 \quad T = \% \frac{C}{12} + \%H + \% \frac{O}{16} + \% \frac{N}{14} \quad (4)$$

200 The C:N ratio was calculated from:

$$201 \quad C:N \text{ ratio} = \frac{\%C}{12} / \frac{\%N}{14} \quad (5)$$

202 The mass balance (on a COD basis) was calculated in two ways, Method A: (methane + new biomass)/  
 203 COD<sub>destroyed</sub>, and Method B: COD<sub>products</sub>/COD<sub>substrates</sub>:

$$204 \quad \text{Mass balance A} = \frac{\frac{LCH_4 \text{ out}}{0.35L \cdot gCOD^{-1}} + (gCOD_{substrates} - gCOD_{digestate}) \times 0.08}{(gCOD_{substrates} - gCOD_{digestate})} \times 100\% \quad (6A)$$

$$205 \quad \text{Mass balance B} = \frac{\frac{LCH_4 \text{ out}}{0.35L \cdot gCOD^{-1}} + (gCOD_{substrates} - gCOD_{digestate}) \times 0.08 + gCOD_{digestate}}{gCOD_{substrates}} \times 100\% \quad (6B)$$

206 Substrate destruction efficiency was calculated from:

$$207 \quad \text{Destr. Eff.} = \left[ 1 - \left( \frac{gCOD_{DG} - gCOD_{BA \text{ remaining}}}{gCOD_{substrate \text{ added}}} \right) \right] \cdot 100\% \quad (7)$$

208 where:

$$209 \quad gCOD_{substrate \text{ added}} = gCOD_{(CB+BB+NP+FP+FW)} \quad (8)$$

$$210 \quad gCOD_{BA \text{ remaining}} = (gTS_{BA \text{ added}} - gTS_{BA \text{ destroyed}}) \cdot \frac{gCOD_{BA}}{gTS_{BA}} \quad (9)$$

211 Specific methane yield, by period, was calculated from:

$$212 \quad \frac{LCH_4 \text{ produced}}{kgCOD_{\text{substrate added}}} \text{ and } \frac{LCH_4 \text{ produced}}{kgVS_{\text{substrate added}}} \quad (10)$$

213 Synergistic biogas was calculated from:

$$214 \quad V_{\text{syn.}} = V_{\text{Total}} - V_{\text{Fibre}} - V_{\text{FW78}} \quad (11)$$

215 Where:  $V_{\text{syn.}}$  is the synergistic (or unaccounted for) methane generated from fibre,  $V_{\text{total}}$  is the measured  
216 total methane produced;  $V_{\text{fibre}}$  is the measured methane produced at 0%  $COD_{\text{FW}}$ , and  $V_{\text{FW78}}$  is the  
217 calculated maximum volume of methane generated from the added FW alone, from  $COD_{\text{FWconverted}}$ ,  
218 assuming  $78 \pm 1\%$   $COD_{\text{FW}}$  conversion, a value obtained from our biochemical methane potential (BMP)  
219 tests (Guilford, 2017) in agreement with the literature (Eleazer et al., 1997).

220

### 221 **3. RESULTS AND DISCUSSION**

222 The results are described and discussed from seven perspectives; 1) analytical results; 2) mass balance;  
223 3) long-term performance and stability; 4) the effect of food waste(FW) addition on the digestibility of  
224 lignocellulosic fibres, and on performance; 5) the relative digestibility of the fibres - CB, BB, NP, FP and  
225 BA - from coupon data; 6) the unexpected effect of a change in bulking agent; and 7) the effect of SRT  
226 on performance.

227

#### 228 **3.1 Analytical results for feedstocks, digestate and biogas**

229 The elemental composition and ash content (and thus VS), of each the substrates and digestates, were  
230 measured and averaged; the stoichiometric formula of each substrate was calculated (Table S2); the  
231 stoichiometric formula of the 83-week weighted average feed to Daisy was also calculated as  
232  $C_{90}H_{155}O_{67}N$ ; The COD content of each of the substrates was calculated from Equations (1), (2), (3) and  
233 (4), and compared to the measured values (Table S2). The measured and calculated values of COD  
234 content corresponded well; unsurprisingly, the greatest discrepancy was for FW, the most variable of

235 the substrates. The TS, VS, and COD of the digestate from all 87 LBs was measured (Table S3). The  
236 average methane content of the biogas was  $58.5 \pm 3.7\%$  from GM1 (the UASB), and  $51.7 \pm 3.6\%$  from GM2  
237 (balance of the system); the weighted average was 52.4% (Table S4). The methane content was also  
238 calculated, from digestion stoichiometry, as 52.5% (using equations shown in Fig. S3). The measured  
239 weekly volume of biogas and of  $\text{CH}_4$ , were corrected to STP (273K and 100kPa) (Table S5).

240

### 241 **3.2 Mass Balance on a COD Basis**

242 Daisy was fed a total of approximately 97 kg of TS and 125 kg of COD over 83 weeks, and produced  
243 approximately 20,000 L of  $\text{CH}_4$  at STP. The mass balance (COD basis) of the entire system was calculated  
244 for each period two different ways using equations 6A and 6B, from week 6 to week 88 inclusive (Table  
245 S6). The cumulative mass balance for all 83 weeks was  $101 \pm 2\%$  (Method A) and  $100 \pm 2\%$  (Method B);  
246 these results thus validate the sampling and analytical methods used, and create a sound foundation  
247 upon which to assess Daisy's performance. The mass balance does show a little variability when  
248 considered by individual Period, particularly using Method B (Table S6); the reasons are discussed in the  
249 description of Table S6 on page 4 of the SI.

250

### 251 **3.3 Long term operation**

252 For each of the 12 operating periods, the feedstock composition, operating conditions, and Daisy's  
253 performance measured as substrate destruction efficiency (Equations 7, 8 and 9) and methane yield  
254 (Equation 10), are shown in Table 1. The input data to all calculations are derived from Tables S1-S5.  
255 The destruction efficiency of BA over 6 weeks averaged about 7%, irrespective of food waste addition  
256 (Table S7). Since BA is to be reused at commercial scale, and would artificially depress measurements of  
257 performance, it was excluded from the calculation of substrate destruction efficiency as shown in  
258 equations (7), (8), and (9).

259

260 The SRT remained at 42 days (*i.e.*, 6 weeks), except during Period 2 (which lasted only 8 weeks) when it

261 was 49 days. Food waste addition, expressed as a percent of total COD added, varied from 17.2% down

262 to 0% then back up to 29.3%. The C:N ratio, calculated from Equation 5 (Table 1), ranged between 48:1

263 and 350:1, depending on FW addition, and was always well above the generally accepted stability

264 threshold of 20:1 (Igoni et al., 2008; Wu et al., 2010; Yadvika, 2004). During Period 5, the BA was

265 changed to a different batch which, unexpectedly, reduced digester performance.

266

267 Fig. 2 shows the entirety of the experimental period, week by week, expressed as: a) substrate

268 destruction efficiency and specific CH<sub>4</sub> yield; b) alkalinity ratio and pH; c) concentration of total VFAs as

269 COD in mg.L<sup>-1</sup>; d) recirculating concentration of inorganic salts in g.L<sup>-1</sup>; and e) recirculating concentration

270 of SO<sub>4</sub><sup>2-</sup> in mg.L<sup>-1</sup>. Methane yield ranged from a low of 52.7 L.kg<sup>-1</sup>COD<sub>added</sub> to a high of 225.4 L.kg<sup>-1</sup>

271 <sup>1</sup>COD<sub>added</sub> and the corresponding COD destruction efficiency from 18.6% to 65.3% (Fig. 2A). Despite wide

272 variations in methane yield and substrate destruction, Daisy's operation remained stable throughout. In

273 particular, the alkalinity ratio (weekly average) remained below 0.52 (against a target of ≤0.4) and the

274 pH between 6.7 and 7.3, with a brief excursion to 7.6 (Fig. 2B). VFA's and sulphate were measured four

275 times per week, beginning at week 35. The first VFA measurement, taken 6h after installation of a LB of

276 fresh waste, showed a sharp spike (except at zero FW); the second and third, taken 1d and 3d later,

277 showed sharp declines (Fig. 2C). At no time was there any indication of a build-up of VFAs, hence the

278 stability of pH and alkalinity ratio. It was discovered, by about week 20, that there was no accumulation

279 of leachate within Daisy, and thus no free wastewater being produced. Measurement of the TS content

280 of the digestate revealed that the same quantity of water was being removed in the digestate as was

281 being added in the feed. By measuring the VS content of the leachate it was possible to determine the

282 fate of the inorganic salts; their concentration within Daisy (Fig. 2D) varied with FW addition, falling from

283 3.5 g.L<sup>-1</sup> in Periods 1, 2 and 3 to 2.0 g.L<sup>-1</sup> in Period 4c, finally rising to 3.3 g.L<sup>-1</sup> during periods 5 and 6. The  
284 amount of inorganic matter removed in the digestate (~ 160g per LB) approximately equaled the  
285 amount added in the feed. Up to week 50, the concentration of sulphate remained close to 50 mg.L<sup>-1</sup>  
286 but then began to rise as the proportion of FW increased, ultimately reaching 125 mg.L<sup>-1</sup> (Fig. 2E).

287

### 288 **3.4 The effect of food waste addition on Daisy's performance – synergy**

289 One of our main objectives was to study the effects of FW addition on digester performance (Table 1). In  
290 Period 3, Daisy was operating at an SRT of 42 days at 17.2%COD<sub>FW</sub>. The average CH<sub>4</sub> was 278 L.wk<sup>-1</sup> or  
291 185 L.kg<sup>-1</sup>COD<sub>added</sub>, and substrate destruction efficiency was 54.2%. In Periods 4a, 4b, and 4c, FW  
292 addition was reduced in three steps; 12.9%COD<sub>FW</sub>, 7.9%COD<sub>FW</sub>, and 0%COD<sub>FW</sub>, respectively. Each step  
293 took 6 weeks (to change all 6 LBs). With each reduction in FW addition CH<sub>4</sub> production fell, first to 198  
294 L.wk<sup>-1</sup>, then 138 L.wk<sup>-1</sup>, and finally 63 L.wk<sup>-1</sup> when no food waste was added. Specific CH<sub>4</sub> production and  
295 substrate destruction efficiency also dropped. At each step, CH<sub>4</sub> production attained its new stable level  
296 within 3 weeks. It was immediately apparent that the drop in CH<sub>4</sub> production could not be accounted for  
297 by the reduction in COD<sub>FW</sub> alone. For example, by Period 4c, FW addition had been reduced by 254  
298 gCOD.wk<sup>-1</sup>, equivalent to 89 L CH<sub>4</sub>.wk<sup>-1</sup> assuming 100% COD<sub>FW</sub> conversion, compared to the measured  
299 drop of 214 LCH<sub>4</sub>.wk<sup>-1</sup>. This left 125 L CH<sub>4</sub>.wk<sup>-1</sup> unaccounted for. The apparent explanation was an  
300 unreported effect whereby FW addition enhanced the digestibility of the fibres, and that the extent of  
301 enhancement was related to the amount of FW added. The objectives of the research were expanded to  
302 include investigation of this apparent synergistic effect.

303

304 In Period 5, Daisy was returned to 17.2%COD<sub>FW</sub> in a single step over 42d (six LB changes). After seven  
305 weeks (at week 57), CH<sub>4</sub> production had gradually risen to (a single week value of) 279 L.wk<sup>-1</sup> and  
306 substrate destruction efficiency of 52%. At this point, the supply of BA#4 was running low, so Daisy was

307 switched to BA#5 for 6 weeks. Performance immediately began to decline (Table 1 and Fig 2A); this was  
308 provisionally attributed to the physical properties of the particular batch of BA, since no other changes  
309 had been made. It took 15 weeks to restore stable CH<sub>4</sub> output at 245 L.wk<sup>-1</sup> (169 L.kg<sup>-1</sup>COD<sub>added</sub>) and a  
310 COD destruction efficiency of 53.0%. This BA phenomenon is discussed more fully in Section 3.6.

311

312 In Period 6a FW addition was raised to 21.2%COD<sub>FW</sub>, CH<sub>4</sub> production reached 297 L.wk<sup>-1</sup> or 189 L.kg<sup>-1</sup>  
313 <sup>1</sup>COD<sub>added</sub>, and a COD destruction efficiency of 56.0%. In Period 6b FW addition was raised once more to  
314 29.3%COD<sub>FW</sub>, CH<sub>4</sub> production reached 384 L.wk<sup>-1</sup> or 225 L.kg<sup>-1</sup>COD<sub>added</sub>, and a COD destruction efficiency  
315 of 65.3%. In both cases, CH<sub>4</sub> production increased by an amount greater than could be accounted for by  
316 the increase in COD<sub>FW</sub>. The synergistic effect of food waste addition on the digestibility of the  
317 lignocellulosic fibres was quantified at each of six levels of COD<sub>FW</sub> addition, using Equation 11, and  
318 plotted in Fig. 3, which also includes substrate destruction efficiency. The magnitude of the synergistic  
319 effect is very large and quite obviously related to the amount of FW added. At 29%COD<sub>FW</sub> the methane  
320 yield from the fibre was nearly 3 times the yield at 0%COD<sub>FW</sub>. The data were also plotted as LCH<sub>4</sub>.kg<sup>-1</sup>  
321 <sup>1</sup>COD<sub>FBadded</sub> vs %COD<sub>FW</sub>, (Fig. S4). This shows a very strong linear relationship to the limit of the available  
322 data, even when using the more conservative assumption of 100%FW conversion to perform the  
323 calculation. It is certain that the effects of FW addition will, at some higher level, become progressively  
324 less beneficial, and this needs further study.

325

326 The addition of FW greatly enhanced the digestibility of the FB in direct proportion to the amount of FW  
327 added, but to differing degrees for different fibres (see Section 3.5). The mechanism is not entirely clear,  
328 but there are indications that it may be enzymatic. Yuan et. al. (2012) subjected samples of FB to  
329 microbial pretreatment (for 2 to 10 days) resulting in a doubling of biogas yield. Zhang et. al. (2007)  
330 found that extracellular enzymes regulated the hydrolysis of organic waste in a high-solids-content



331 digester. A companion microbiological study conducted on samples of leachate, digestate, and food  
332 waste from Daisy show clear trends in microbial abundance related to FW addition (Lee, 2018) and will  
333 be reported separately.

334

### 335 **3.5 The digestibility of individual fibres and bulking agent**

336 Not all the fibres are equally digestible and this offers some further insight into the mechanism of  
337 synergy. The digestibility of individual fibre samples embedded in the LBs was assessed using coupon  
338 tests. Coupons (tea balls) were present under all operating conditions. The destruction efficiency of all  
339 four individual fibres – CB, BB, NP, and FP plus BA, at the same six COD<sub>FW</sub> addition rates (Table S7), are  
340 plotted in Fig. 4. It is immediately apparent that their digestibility is ranked FP>CB>BB>NP>BA and this is  
341 consistent with the literature (Buffiere et al., 2008; Eleazer et al., 1997; Pommier et al., 2010). It is also  
342 apparent that the differences among them grow wider as %COD<sub>FW</sub> increases. It would also appear that  
343 the digestibility of the fibres may be directly related to the severity of the pulping processes used in  
344 their manufacture; FP is chemically pulped and bleached and contains no lignin, CB and BB are also  
345 chemically pulped but still contain some lignin (also the latter is coated on one or both sides), NP is  
346 mechanically pulped and has a high lignin content, and BA is not pulped at all.

347

348 The coupon results also provided two further pieces of data; firstly, the digestibility of the BA ranged  
349 from 3.8% to 8%, averaged 7.0%, and rose only slightly with FW addition, but the standard deviations  
350 are large (Table S7). The average value was used to calculate the amount of undigested COD<sub>BA</sub>, subtract  
351 it from the COD<sub>DG</sub>, and calculate substrate destruction efficiency excluding BA. Secondly, it suggested  
352 that the digestibility of NP rises, then declines, with FW addition (Fig. 4). This particular anomalous trend  
353 for NP requires verification.

354

### 355 **3.6 The effect of bulking agent on Daisy's performance**

356 The switch to BA#5 caused a vexing decline in performance ( $\text{CH}_4$  yield and COD destruction efficiency) of  
357 about 20%. After six weeks (at week 64), leach beds were progressively switched back to BA#4 (from a  
358 reserve supply). Performance gradually improved and, at week 71, the BA was switched again to BA#6,  
359 methane production eventually stabilized at prior levels, and Period 6 began at week 74. BA#4 and BA#6  
360 were prepared with a Roto-Chopper (essentially a shredder which produces splinters of wood), and the  
361 larger particles screened out; the two batches were similar in appearance and behaviour. BA#5 was very  
362 different; it was produced with a chipper, and the particles were coarser, shorter and fatter (Fig. S2).  
363 Simple tests of the physical properties of the two batches (Table S8) showed that BA#5 had a slightly  
364 higher proportion of coarse particles, about twice the bulk density, and 80% of the water retention  
365 capacity of BA#4. The literature shows that digester efficiency is very dependent on maintaining a  
366 moisture content of about 80% in SS-AD (Abbassi-Guendouz et al., 2012; Le Hyaric et al., 2012; Motte et  
367 al., 2013; Xu et al., 2014). These observations suggest that the physical properties of the BA may play a  
368 greater role in digestion efficiency than merely ensuring LB permeability. Another possibility is that the  
369 chemical composition of BA#5 was different, perhaps because the wood was greener and recently  
370 chipped.

371

### 372 **3.7 Solids retention time**

373 During Period 1 (weeks 6 to 15) conditions were kept constant in all respects at 17.2% $\text{COD}_{\text{FW}}$ ; stable  
374 operation was achieved, with an average  $\text{CH}_4$  output of 247  $\text{L}\cdot\text{wk}^{-1}$  or 169  $\text{L}\cdot\text{kg}^{-1}\text{COD}_{\text{added}}$ , and a substrate  
375 destruction efficiency of 53.7% (Table 1 and Fig. 2A). In Period 2 the SRT was extended to 49d from 42d.  
376 This had the effect of creating unevenness in  $\text{L}\cdot\text{CH}_4\cdot\text{wk}^{-1}$ , reflected in the increased coefficient of  
377 variation (Table 1). Nevertheless, performance remained unchanged at 172  $\text{L}\cdot\text{CH}_4\cdot\text{kg}^{-1}\text{COD}_{\text{added}}$ , and COD  
378 destruction efficiency of 53.5%. Extending the SRT to 49d was not beneficial. At week 88, Daisy was shut

379 down and the last six LBs removed simultaneously. Substrate destruction efficiency at 29.3%COD<sub>FW</sub>, was  
380 determined for all 6 LBs, and plotted against SRT (Fig. 5). Daisy achieved 68.4% COD destruction at 42d,  
381 at which point the curve is almost flat (and presumably close to the asymptote). However, destruction  
382 efficiency had already reached 63.5% at 21d and 66.8% at 28d. These results suggest that, at  
383 29.3%COD<sub>FW</sub>, 98% of ultimate performance had already been achieved with an SRT of just 28d. Of  
384 necessity, this was a single experiment, but it strongly suggests that the SRT can be significantly reduced  
385 with little loss in performance.

386

### 387 **3.8 Comparison to other digesters with similar substrates**

388 Daisy's performance on a VS basis was compared to that of other digesters with similar substrates,  
389 (Table 2). Three of the comparators were BMP tests (Eleazer et al., 1997; Pommier et al., 2010; Yuan et  
390 al., 2012; Yuan et al., 2014), one was a CSTR (Zhang et al., 2012) and one a comparison of a CSTR to a LB  
391 system (Di Maria et al., 2017). All three BMP studies found the same ranking of fibre digestibility as the  
392 present research, FP>CB>BB>NP, and all achieved a higher destruction efficiency and biogas yield than  
393 Daisy, but all with longer SRTs of 90d, 60d and up to 600d, respectively. At 29.3%COD<sub>FW</sub> with an SRT of  
394 42d Daisy gave an equivalent performance (296 LCH<sub>4</sub>.kg<sup>-1</sup>VS<sub>added</sub> and 69%VS<sub>destr.</sub>) to a CSTR digesting  
395 mechanically-recovered OFMSW (Zhang et al., 2012) with an SRT of 30d (304 LCH<sub>4</sub>.kg<sup>-1</sup>VS<sub>added</sub> and  
396 62%VS<sub>destr.</sub>). Even at an SRT of 28d, Daisy's performance was virtually undiminished (Fig. 4). Once more,  
397 the beneficial effect of FW addition is apparent. Compared to Di Maria et al. (2017), Daisy's performance  
398 surpassed that of their LB system, but was slightly inferior to their CSTR.

399

400 Overall, this study demonstrated that the operation of a simple solid-state digestion process (Daisy) with  
401 no mixing of the solid organic waste remained stable throughout, showing a high tolerance of variations  
402 in feedstock, delivered a high methane yield in a much shorter SRT than anticipated, and did so because

403 of the unexpected effect of FW on the digestibility of fibres. This digester design is simple and relatively  
404 easily scaled and well suited to the North American situation. Further study is required to determine the  
405 limits of synergistic biogas production and its mechanism(s), the effects of SRT and of leachate  
406 recirculation rates on digester performance and stability and on the way each LB functions, and the  
407 potential to operate without the UASB. The rising concentration of sulphate, in response to increased  
408 food waste addition, raises questions about the apparent lack or suppression of sulphate reducing  
409 bacteria which also requires investigation. The unexpectedly strong performance of Daisy suggests  
410 larger scale demonstrations should be undertaken.

411

#### 412 **ACKNOWLEDGMENTS**

413 This research was funded by the Natural Sciences and Engineering Research Council of Canada  
414 (Collaborative Research and Development Grant), and by Miller Waste Systems Inc. We thank Mike  
415 Kopansky, John Tomory and Charlie Cassin of Miller Waste Systems for preparing and providing samples,  
416 our colleagues at the University of Toronto, Brad Saville, Grant Allen, Savia Gavazza, Paul Jowlabar,  
417 Glenn Wilson, Greg Brown and Andy Quaille, for their experience and insights.

418

#### 419 **SUPPORTING INFORMATION**

420 Detailed description of analytical methods, eight supplementary tables of raw data and calculations, and  
421 four supplementary figures showing coupon placement, bulking agent batches and specific methane  
422 production.

423

424

425

426

427 **REFERENCES (formatted as author-date for review purposes only)**

- 428 Abbassi-Guendouz, A., Brockmann, D., Trably, E., Dumas, C., Delgenes, J.P., Steyer, J.P., Escudie, R. 2012.  
429 Total solids content drives high solid anaerobic digestion via mass transfer limitation.  
430 *Bioresource Technology*, **111**, 55-61.
- 431 APHA. 1992. Standard methods for the examination of water and wastewater. 18th ed, American Public  
432 Health Association. Washington DC.
- 433 Browne, J.D., Allen, E., Murphy, J.D. 2013a. Improving hydrolysis of food waste in a leach bed reactor.  
434 *Waste Management*, **33**(11), 2470-2477.
- 435 Browne, J.D., Murphy, J.D. 2013b. Assessment of the resource associated with biomethane from food  
436 waste. *Applied Energy*, **104**, 170-177.
- 437 Browne, J.D., Murphy, J.D. 2014. The impact of increasing organic loading in two phase digestion of food  
438 waste. *Renewable Energy*, **71**, 69-76.
- 439 Buffiere, P., Frederic, S., Marty, B., Delgenes, J.P. 2008. A comprehensive method for organic matter  
440 characterization in solid wastes in view of assessing their anaerobic biodegradability. *Water*  
441 *Science and Technology*, **58**(9), 1783-1788.
- 442 City of Ottawa. 2007. ICI and CD Management Options Report: ICI 3Rs Strategy Project. Ottawa.
- 443 De Baere, L., Mattheeuws, B. 2013. Anaerobic digestion of the organic fraction of municipal solid waste  
444 in Europe – Status, experience and prospects. in: *Waste Management*, (Eds.) K.J. Thomé-  
445 Kozmiensky, S. Thiel, pp. 517-526.
- 446 Di Maria, F., Barratta, M., Bianconi, F., Placidi, P., Passeri, D. 2017. Solid anaerobic digestion batch with  
447 liquid digestate recirculation and wet anaerobic digestion of organic waste: Comparison of  
448 system performances and identification of microbial guilds. *Waste Management*, **59**, 172-180.
- 449 Eleazer, W.E., Odle, W.S., Wang, Y.S., Barlaz, M.A. 1997. Biodegradability of municipal solid waste  
450 components in laboratory-scale landfills. *Environmental Science & Technology*, **31**(3), 911-917.
- 451 Environment Canada. 2017. National Inventory Report 1990-2015 Greenhouse Gas Sources and Sinks in  
452 Canada, Queen's Printer. Ottawa.
- 453 European Union. 1999. European Union Landfill Directive 1999/31/EC, April 26, 1999. European Union  
454 Publications Office. .
- 455 Forrestal, B.J., Guilford, N.G.H., Poland, R.J. 2006a. Canadian Patent 2,468,158; System and Method for  
456 the Production of Biogas and Compost, BioPower Energy Inc. Canada.
- 457 Forrestal, B.J., Guilford, N.G.H., Poland, R.J. 2006b. United States Patent 7,101,481; System for the  
458 Production of Biogas and Compost from Organic Materials and Method of Operating an Organic  
459 Treatment Facility, BioPower Energy Inc. USA.
- 460 Government of Canada. 2010. Environment Canada - Report on Waste Management, Environment  
461 Canada. Ottawa.
- 462 Government of Canada. 2015. State of Waste Management in Canada, Queen's Printer. Ottawa.
- 463 Government of Ontario. 2004. Ontario's 60% Waste Diversion Goal - A Discussion Paper, (Ed.) Ministry of  
464 the Environment, Queen's Printer for Ontario. Toronto.
- 465 Guilford, N.G.H. 2017. The Anaerobic Digestion of Organic Solid Wastes of Variable Composition. PhD  
466 Thesis, *Department of Chemical Engineering and Applied Chemistry*, University of Toronto.  
467 Toronto, pp. 240. <https://tspace.library.utoronto.ca/handle/1807/80954>
- 468 Guilford, N.G.H. 2009. A New technology for the Anaerobic Digestion of Organic Waste. M.Eng thesis,  
469 *Department of Chemical Engineering and Applied Chemistry*, University of Toronto. Toronto, pp.  
470 112. <https://tspace.library.utoronto.ca/handle/1807/18314>
- 471 Hodge, K.L., Levis, J.W., DeCarolis, J.F., Barlaz, M.A. 2016. Systematic Evaluation of Industrial,  
472 Commercial, and Institutional Food Waste Management Strategies in the United States.  
473 *Environmental Science & Technology*, **50**(16), 8444-8452.

- 474 Igoni, A.H., Ayotamuno, M.J., Eze, C.L., Ogaji, S.O.T., Probert, S.D. 2008. Designs of anaerobic digesters  
475 for producing biogas from municipal solid-waste. *Applied Energy*, **85**(6), 430-438.
- 476 Le Hyaric, R., Benbelkacem, H., Bollon, J., Bayard, R., Escudie, R., Buffiere, P. 2012. Influence of moisture  
477 content on the specific methanogenic activity of dry mesophilic municipal solid waste digestate.  
478 *Journal of Chemical Technology and Biotechnology*, **87**(7), 1032-1035.
- 479 Lee, HW. 2018. Microbial Diversity and Abundance in a Sequentially-fed Anaerobic Digester treating  
480 Food Waste and Lignocellulosic fibres. MASc thesis, *Department of Chemical Engineering and*  
481 *Applied Chemistry*, University of Toronto. <https://tspace.library.utoronto.ca/handle/1807/89607>
- 482 Motte, J.C., Escudie, R., Bernet, N., Delgenes, J.P., Steyer, J.P., Dumas, C. 2013. Dynamic effect of total  
483 solid content, low substrate/inoculum ratio and particle size on solid-state anaerobic digestion.  
484 *Bioresource Technology*, **144**, 141-148.
- 485 Murto, M., Bjornsson, L., Rosqvist, H., Bohn, I. 2013. Evaluating the biogas potential of the dry fraction  
486 from pretreatment of food waste from households. *Waste Management*, **33**(5), 1282-1289.
- 487 Pommier, S., Llamas, A.M., Lefebvre, X. 2010. Analysis of the outcome of shredding pretreatment on the  
488 anaerobic biodegradability of paper and cardboard materials. *Bioresource Technology*, **101**(2),  
489 463-468.
- 490 Rittmann, B.E., McCarty, P.L. 2001. *Environmental Biotechnology: Principles and Applications*. McGraw-  
491 Hill.
- 492 Satchwel, A.J., Scown, C.D., Smith, S.J., Arnirebrahimi, J., Jin, L., Kirchstetter, T.W., Brown, N.J., Preble,  
493 C.V. 2018. Accelerating the Deployment of Anaerobic Digestion to Meet Zero Waste Goals.  
494 *Environmental Science & Technology*, **52**(23), 13663-13669.
- 495 Wu, X., Yao, W.Y., Zhu, J., Miller, C. 2010. Biogas and CH<sub>4</sub> productivity by co-digesting swine manure  
496 with three crop residues as an external carbon source. *Bioresource Technology*, **101**(11), 4042-  
497 4047.
- 498 Xu, F.Q., Wang, Z.W., Tang, L., Li, Y.B. 2014. A mass diffusion-based interpretation of the effect of total  
499 solids content on solid-state anaerobic digestion of cellulosic biomass. *Bioresource Technology*,  
500 **167**, 178-185.
- 501 Yadvika, S., T.R. Sreekrishnan, Sangeeta Kohli, Vineet Rana. 2004. Enhancement of biogas production  
502 from solid substrates using different techniques. *Bioresource Technology*, **95**, 1-10.
- 503 Yuan, X.F., Cao, Y.Z., Li, J.J., Wen, B.T., Zhu, W.B., Wang, X.F., Cui, Z.J. 2012. Effect of pretreatment by a  
504 microbial consortium on methane production of waste paper and cardboard. *Bioresource*  
505 *Technology*, **118**, 281-288.
- 506 Yuan, X.F., Wen, B.T., Ma, X.G., Zhu, W.B., Wang, X.F., Chen, S.J., Cui, Z.J. 2014. Enhancing the anaerobic  
507 digestion of lignocellulose of municipal solid waste using a microbial pretreatment method.  
508 *Bioresource Technology*, **154**, 1-9.
- 509 Zhang, B., He, P.J., Lu, F., Shao, L.M., Wang, P. 2007. Extracellular enzyme activities during regulated  
510 hydrolysis of high-solid organic wastes. *Water Research*, **41**(19), 4468-4478.
- 511 Zhang, Y., Banks, C.J., Heaven, S. 2012. Anaerobic digestion of two biodegradable municipal waste  
512 streams. *Journal of Environmental Management*, **104**, 166-174.

513

514

## TABLES

**Table 1. Operating conditions, substrate destruction efficiency as VS and COD, and CH<sub>4</sub> yield, all by Period**

| Period         | Weeks   | BA Batch | Operating Conditions      |                 |     |                                  |                        |          | % Substrate Destruction |      | CH <sub>4</sub> production |    |                                        |                                         |
|----------------|---------|----------|---------------------------|-----------------|-----|----------------------------------|------------------------|----------|-------------------------|------|----------------------------|----|----------------------------------------|-----------------------------------------|
|                |         |          | gCOD <sub>added</sub> /LB |                 |     | <sup>b</sup> COD <sub>FW</sub> % | <sup>c</sup> C:N ratio | SRT days | VS                      | COD  | L.wk <sup>-1</sup>         | n  | L.kg <sup>-1</sup> VS <sub>added</sub> | L.kg <sup>-1</sup> COD <sub>added</sub> |
|                |         |          | BA                        | <sup>a</sup> FB | FW  |                                  |                        |          |                         |      |                            |    |                                        |                                         |
| 1              | 6 - 15  | 1        | 645                       | 1200            | 250 | 17.2                             | 74                     | 42       | 57.3                    | 53.7 | 247±7                      | 10 | 219                                    | 169                                     |
| 2 <sup>d</sup> | 16 - 24 | 2        | 645                       | 1200            | 250 | 17.2                             | 74                     | 49       | 58.2                    | 53.5 | 197±26                     | 9  | 223                                    | 172                                     |
| 3              | 26 - 31 | 2 & 3    | 645                       | 1200            | 250 | 17.2                             | 74                     | 42       | 59.3                    | 54.2 | 278±18                     | 5  | 239                                    | 185                                     |
| 4a             | 32 - 37 | 4        | 645                       | 1200            | 178 | 12.9                             | 93                     | 42       | 43.2                    | 38.9 | 198±5                      | 5  | 184                                    | 143                                     |
| 4b             | 38 - 44 | 4        | 645                       | 1200            | 104 | 7.9                              | 130                    | 42       | 33.2                    | 31.8 | 138±3                      | 4  | 135                                    | 105                                     |
| 4c             | 44 - 49 | 4        | 645                       | 1200            | 0   | 0.0                              | 350                    | 42       | 20.0                    | 18.6 | 63±4                       | 4  | 67                                     | 52.7                                    |
| 5a             | 50 - 57 | 4        | 645                       | 1200            | 250 | 17.2                             | 74                     | 42       | 53.1                    | 51.7 | 217±21                     | 6  | 210                                    | 162                                     |
| 5b             | 58 - 63 | 5        | 645                       | 1200            | 250 | 17.2                             | 74                     | 42       | 45.9                    | 43.8 | 251±26                     | 6  | 217                                    | 168                                     |
| 5c             | 64 - 70 | 4        | 645                       | 1200            | 250 | 17.2                             | 74                     | 42       | 48.7                    | 43.9 | 218±16                     | 6  | 200                                    | 154                                     |
| 5d             | 71 - 74 | 6        | 645                       | 1200            | 250 | 17.2                             | 74                     | 42       | 56.3                    | 53.0 | 245±19                     | 5  | 219                                    | 169                                     |
| 6a             | 74 - 80 | 6        | 645                       | 1200            | 333 | 21.7                             | 62                     | 42       | 63.5                    | 56.0 | 297±12                     | 6  | 246                                    | 189                                     |
| 6b             | 81 - 88 | 6        | 645                       | 1200            | 500 | 29.3                             | 48                     | 42       | 69.4                    | 65.3 | 384±8                      | 6  | 296                                    | 225                                     |

<sup>a</sup>gCOD<sub>FB</sub> comprises CB = 482, BB = 380, NP = 142 and FP = 196; <sup>b</sup>Calculated as percent of FB + FW (without BA). <sup>c</sup>Calculated as a weighted avg. from elemental analysis (Table S2) <sup>d</sup>Seven week SRT achieved by twice skipping a LB replacement at the seventh week, over a total of 9 weeks; substrate destruction efficiency unchanged; 7 weeks of methane production spread over 9 weeks to give an effective yield = 197\*9/7 = 253 L.wk<sup>-1</sup>; cf Period 1.

**Table 2. Daisy's performance compared to that of other digesters fed with similar substrates**

| Data Source              | Reactor Design and Operation            | Substrates(s)                 | SRT (d) | COD <sub>FW</sub> % | Methane yield mLCH <sub>4</sub> .<br>g <sup>-1</sup> VS <sub>added</sub> | Percent destruction efficiency as VS |
|--------------------------|-----------------------------------------|-------------------------------|---------|---------------------|--------------------------------------------------------------------------|--------------------------------------|
| Daisy (this study)       | Sequentially-fed leach beds             | CB+BB+FP+NP plus FW           | 42      | 0                   | 66.8                                                                     | 20.0                                 |
|                          | plus UASB                               |                               |         | 7.9                 | 134.8                                                                    | 33.2                                 |
|                          | 6 LBs 50L total                         |                               |         | 12.9                | 184.4                                                                    | 43.2                                 |
|                          | UASB 27L                                |                               |         | 17.2                | 218.7                                                                    | 56.3                                 |
|                          | 2 Tanks 35L total                       |                               |         | 21.7                | 246.0                                                                    | 63.5                                 |
|                          |                                         |                               |         | 29.3                | 296.3                                                                    | 69.4                                 |
| Pommier et al. (2010)    | BMP tests, six grams of substrate       | CB + BB + NP + FP + magazines | 90      |                     | 149.6                                                                    | 42.0                                 |
| Yuan et al. (2012, 2014) | BMP tests: with microbial pre-treatment | CB+FP+NP                      | 60      |                     | 92.9                                                                     | N/A                                  |
|                          | BMP tests: no microbial pre-treatment   |                               |         |                     | 209.0                                                                    | N/A                                  |
| Eleazer et al. (1997)    | BMP + daily leachate recirc.            | FW                            | 600     |                     | 320.6                                                                    | 77.4                                 |
|                          | 2L reactors                             | NP                            |         |                     | 75.4                                                                     | 31.1                                 |
|                          |                                         | CB                            |         |                     | 155.0                                                                    | 54.4                                 |
|                          |                                         | FP                            |         |                     | 288.0                                                                    | 54.6                                 |
|                          |                                         | MSW                           |         |                     | 122.3                                                                    | 58.4                                 |
| Zhang et al. (2012)      | CSTR semi-cont. feed 35L                | mr-OFMSW                      | 30      |                     | 304.0                                                                    | 62.0                                 |
| Di Maria et al. (2017)   | CSTR - 100L                             | OFMSW                         | 30      |                     | 320.0                                                                    | N/A                                  |
|                          | Leach bed - 100L                        |                               |         |                     | 252.0                                                                    | N/A                                  |

CB = cardboard, BB = boxboard, FP = fine paper, NP = newsprint, FW = food waste, OFMSW = organic fraction of municipal solid waste, mr-OFMSW = mechanically recovered OFMSW. N/A = not available



## FIGURES

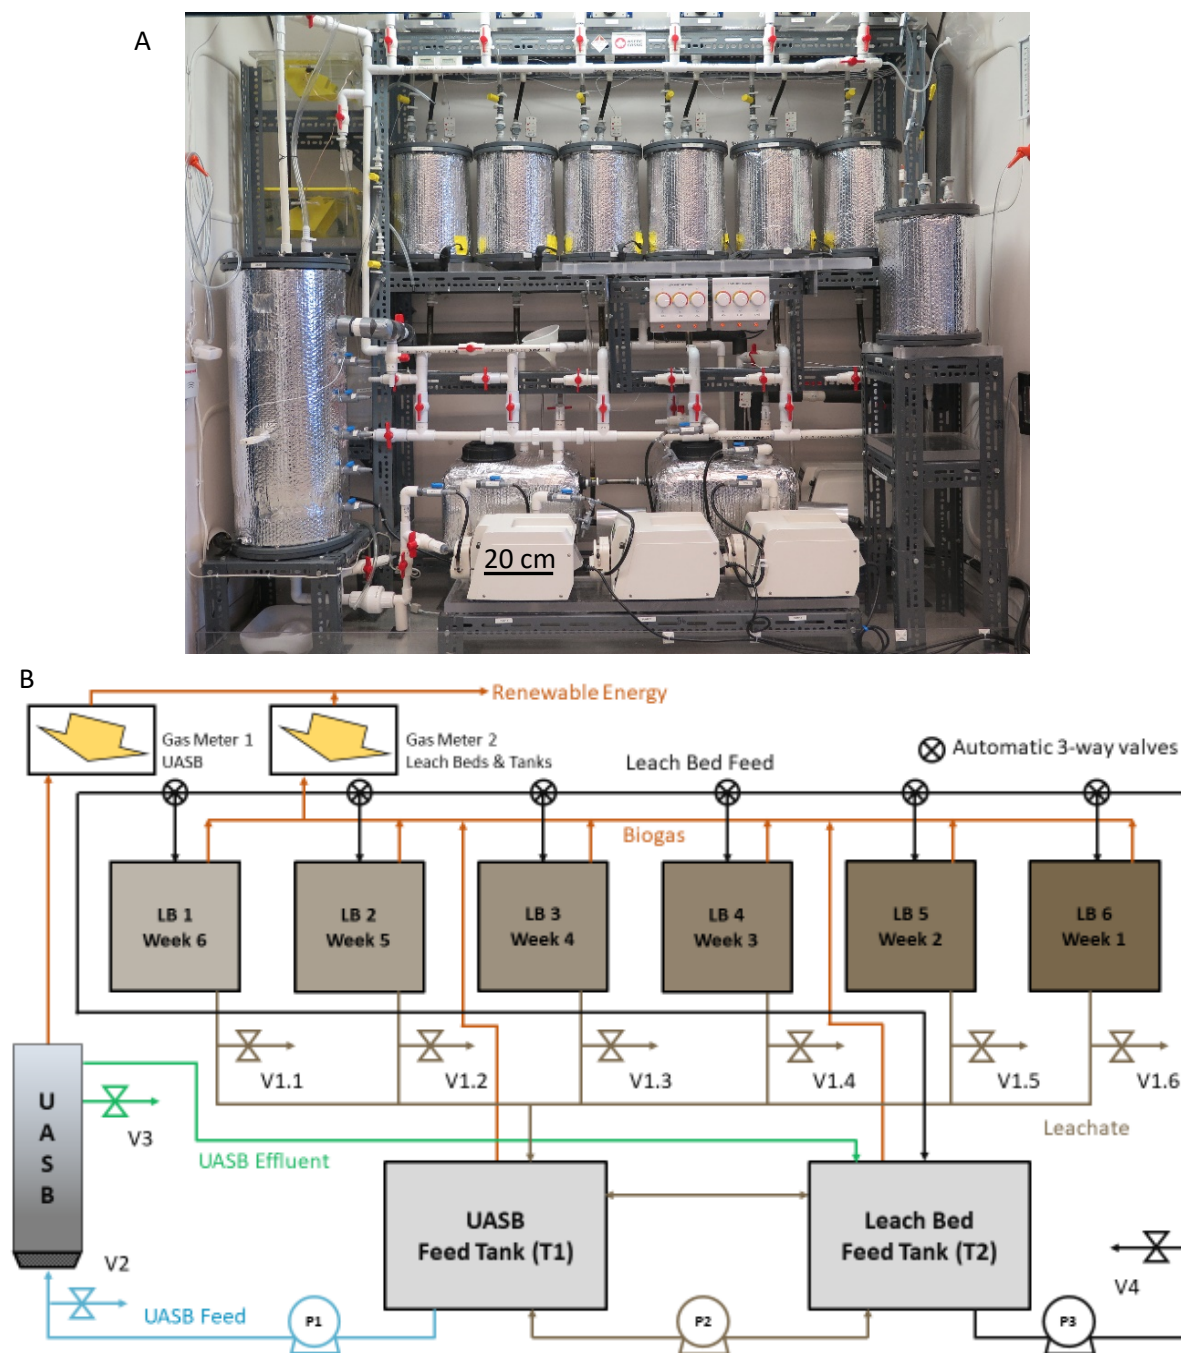

**Fig. 1:** Daisy the Digester. A. Photograph; B. Schematic process flow diagram; 6 LBs fed sequentially at 1 wk. intervals; one UASB; 2 leachate tanks – T1 to feed UASB, and T2 to feed LBs; 3 peristaltic pumps – P3 feeding LBs, P1 feeding UASB, P2 balancing T1 and T2; two wet-tip gas meters, 6 automatic 3-way valves and 9 sampling valves.

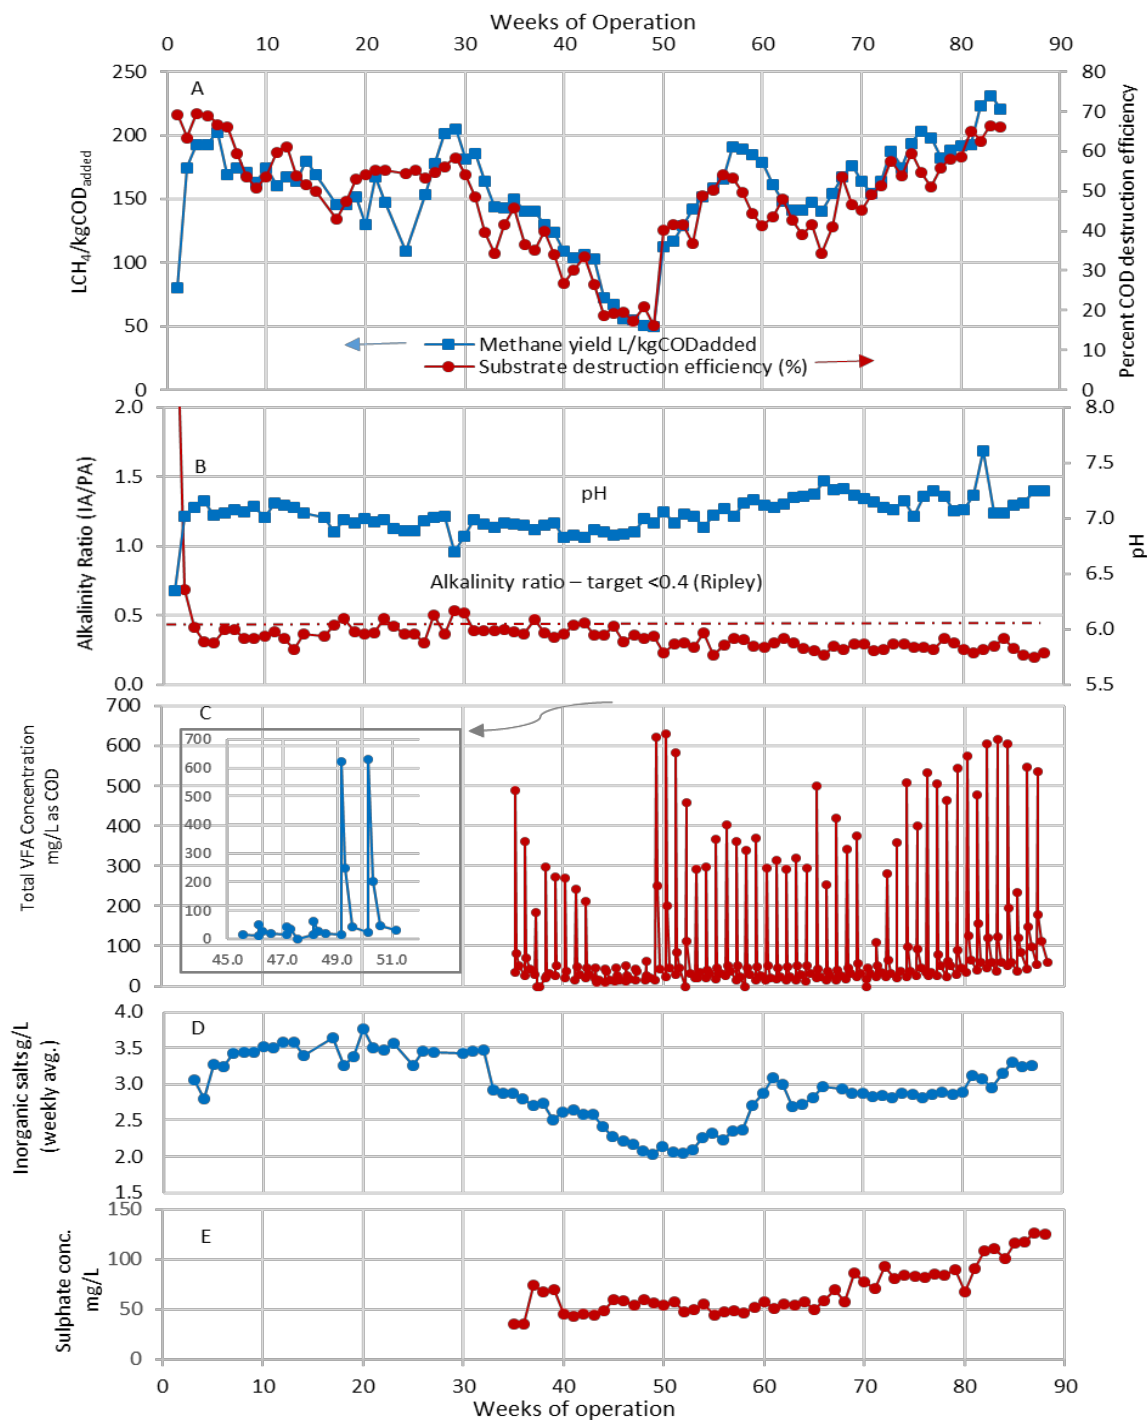

**Fig. 2:** Daisy's performance vs. time. **A)** weekly methane production (L/kgCOD<sub>added</sub>); substrate COD destr. eff. (%); **B)** alkalinity ratio (wkly avg.) - ideal ratio <math><0.4</math>, and pH; **D)** total VFAs, acetate + propionate + butyrate, (mg/L as COD, 4x wkly); **C)** conc. of recirc. inorganic salts (g/L, wkly avg.); **E)** conc. of recirc. sulphate (g/L, wkly avg.).

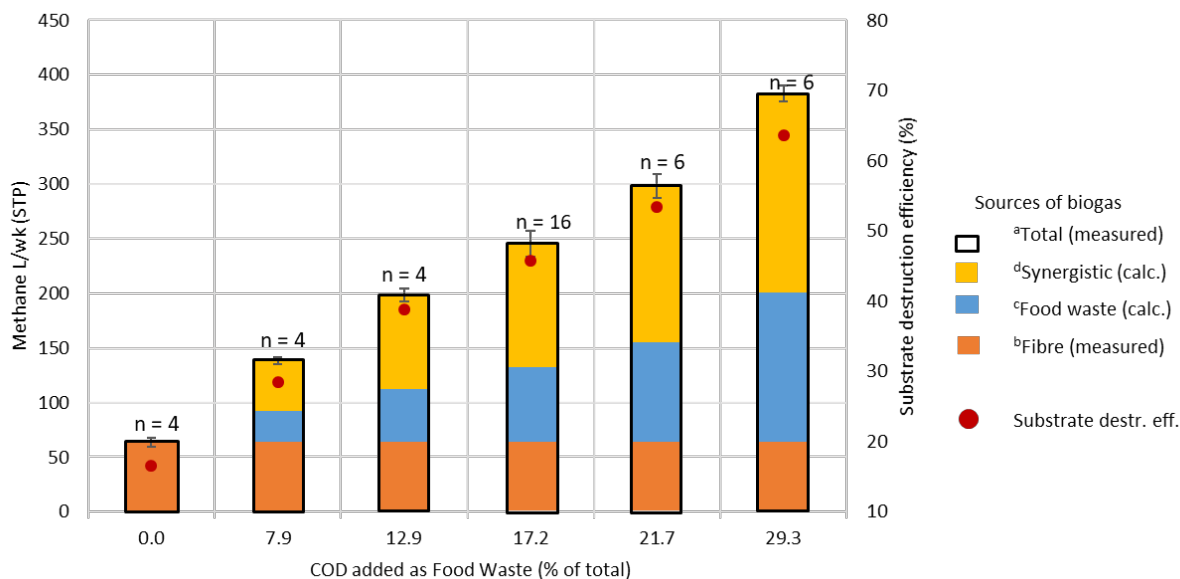

**Fig. 3:** The effect of food waste addition on methane production (bars) and substrate destruction efficiency (red dots). <sup>a</sup>Total measured vol. CH<sub>4</sub> (L.wk<sup>-1</sup>); <sup>b</sup>measured vol. CH<sub>4</sub> from FB alone (no FW); <sup>c</sup>calculated vol. CH<sub>4</sub> from FW added assuming 78% COD conversion; <sup>d</sup>synergistic biogas from FB as a result of FW addition calculated by difference. All vol. in L.wk<sup>-1</sup> at STP; methane at 52.4% of biogas and assumed 78% COD<sub>FW</sub> conv. was determined from BMP tests. (see also Figure S4)

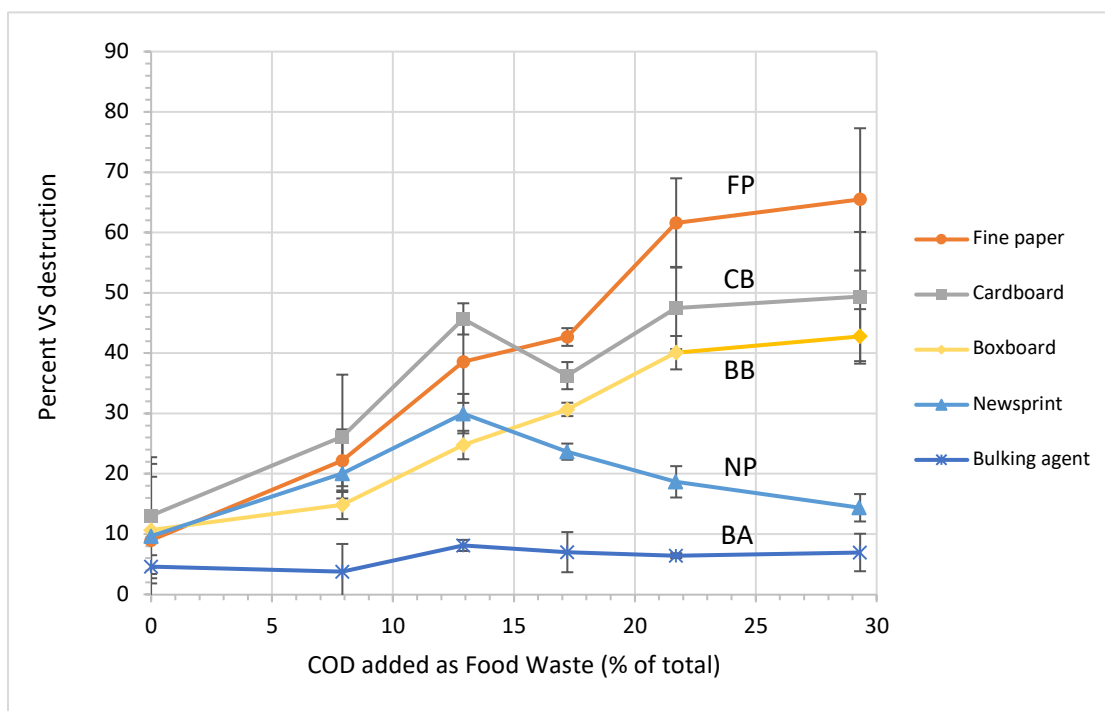

**Fig. 4:** Destruction efficiency of individual FB samples within Daisy vs. FW addition rate based on data from coupon tests. Shows ranking of digestibility FP>CB>BB>NP>BA and effect of %COD<sub>FW</sub>; note absence of FW effect on BA.

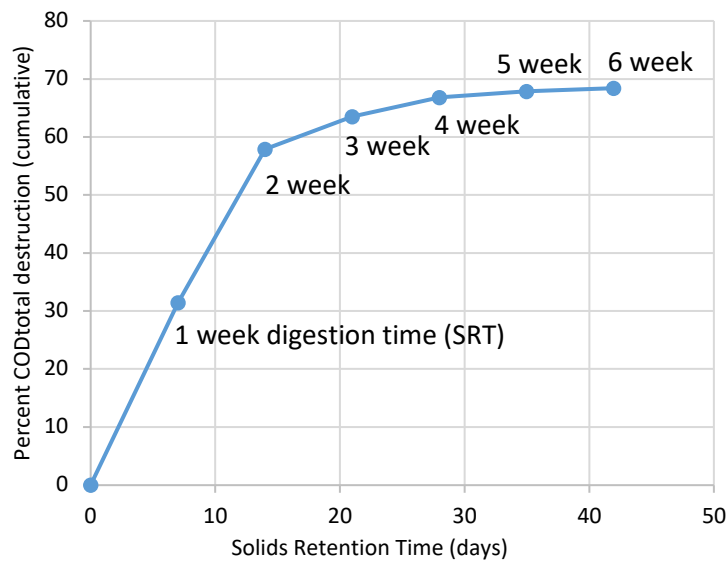

**Fig. 5:** COD Destruction vs Digestion Time at 29%COD<sub>FW</sub>. Data from final week 88 when 6 LBs removed simultaneously (each with a different SRT).
